# Supplementary material
Source: PubMed Central journal article supplement (PMC7066989)
Supplement: NIHMS1562575-supplement-1.pdf [file NIHMS1562575-supplement-1.pdf]

# **NMR based quantitation of cycloartane triterpenes in black cohosh extracts**

Ayano Imai, David Lankin, Tanja Gödecke, Shao-Nong Chen, Guido F. Pauli\*

UIC/NIH Center for Botanical Dietary Supplements Research, Program for Collaborative Research in the Pharmaceutical Sciences (PCRPS) and Department of Pharmaceutical Sciences, College of Pharmacy, University of Illinois at Chicago, Chicago, IL 60612, United States

## **Supplementary Data**

---

\* Corresponding author. *E-mail address:* [gfp@uic.edu](mailto:gfp@uic.edu) (G.F. Pauli).

## **Table of Contents**

Fig. S1. Stacked  $^1\text{H}$  NMR spectra of 70% aqueous MeOH extracts of AR species

Fig. S2. Stacked  $^1\text{H}$  NMR spectra of 70% aqueous MeOH extracts of AP species

Fig. S3. Stacked  $^1\text{H}$  NMR spectra of 70% aqueous MeOH extracts of AC species

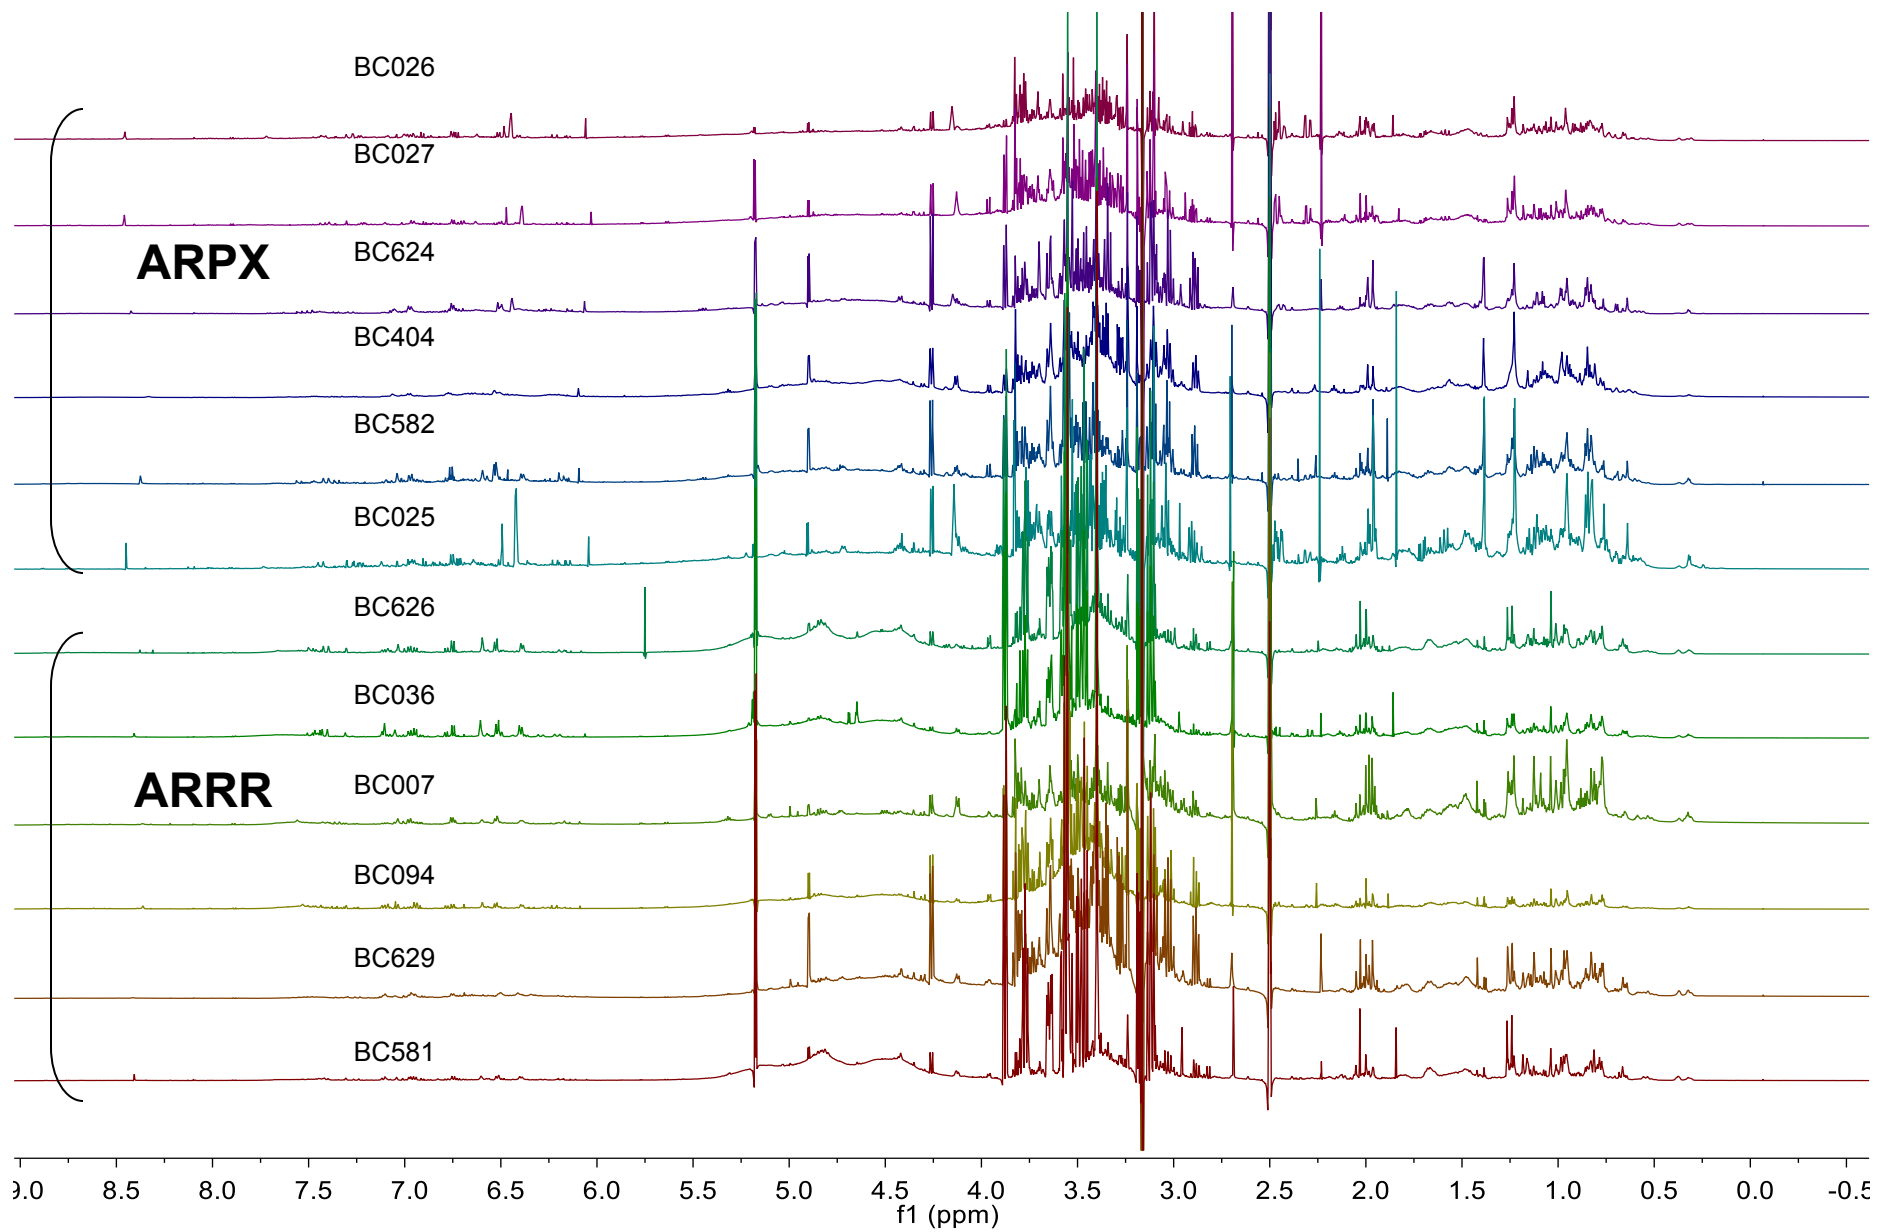

**Fig. S1. Stacked  $^1\text{H}$  spectra of 70% aqueous MeOH extracts of AR species**

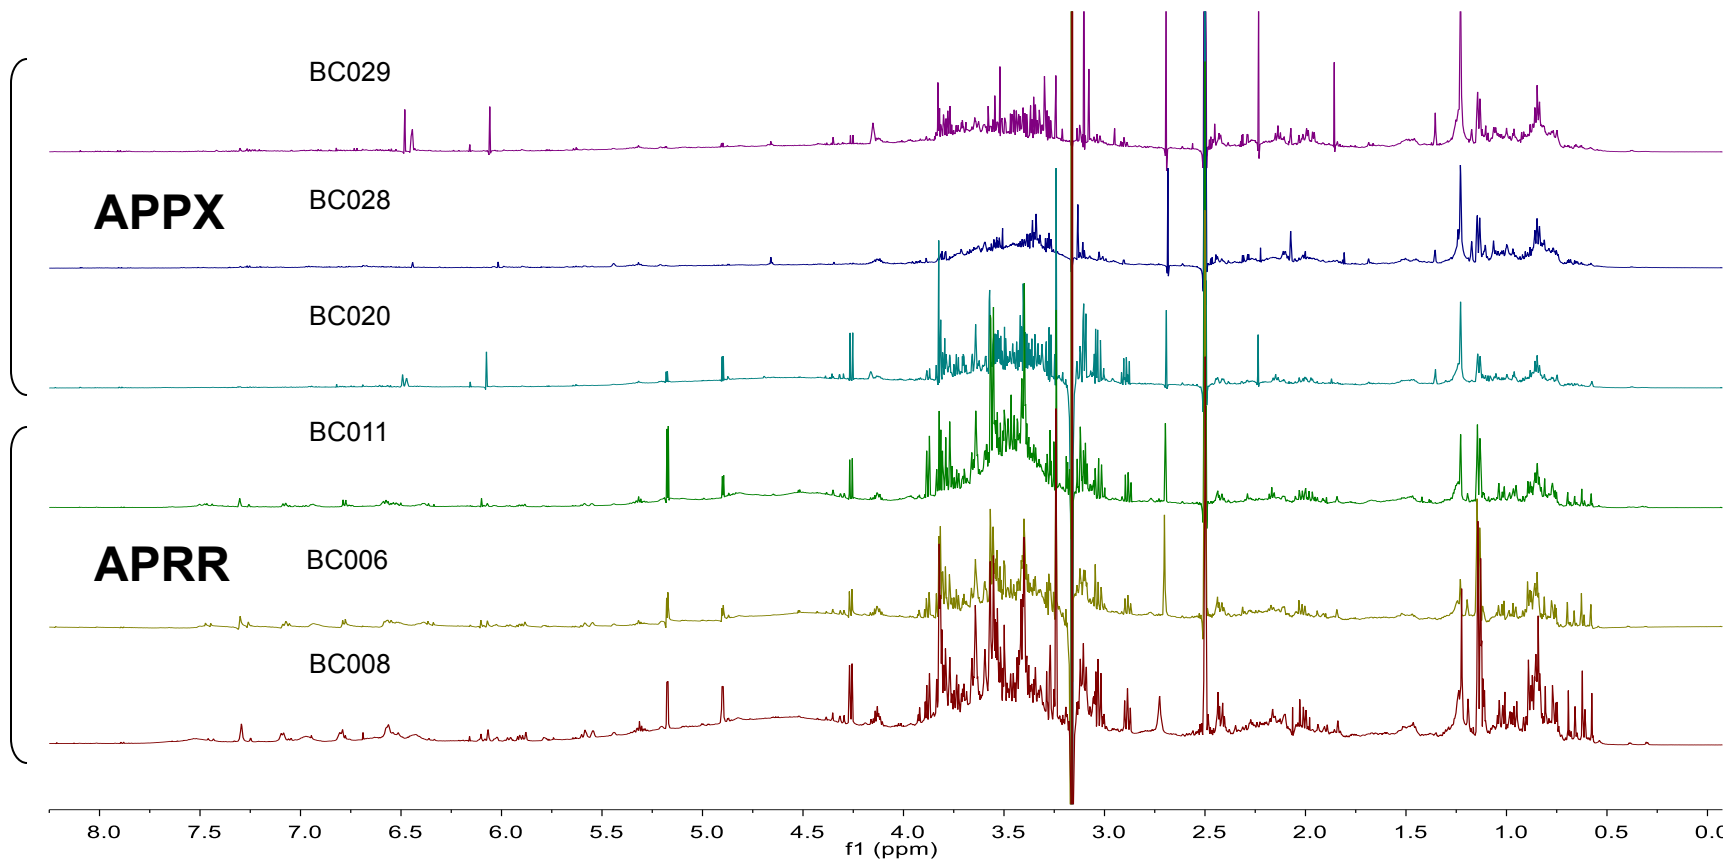

**Fig. S2. Stacked <sup>1</sup>H spectra of 70% aqueous MeOH extracts of AP species**

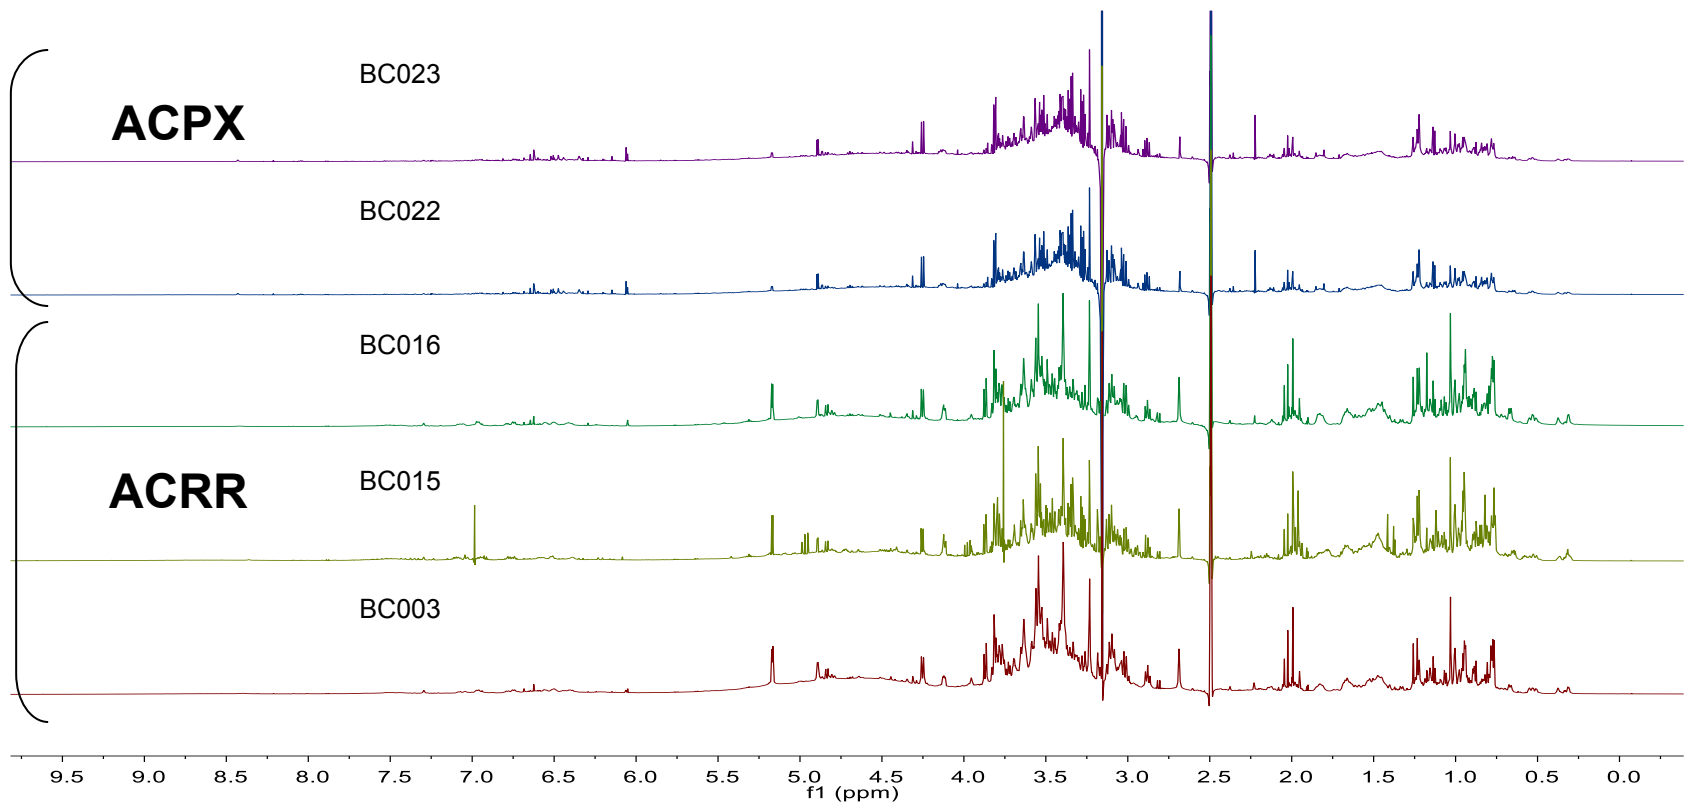

**Fig. S3. Stacked  $^1\text{H}$  spectra of 70% aqueous MeOH extracts of AC species**
